# Supplementary material for: Highly sensitive OFET based room temperature operated gas sensors using a thieno[3,2-b]thiophene extended phthalocyanine semiconductor
Source: Royal Society of Chemistry journal article supplement (doi:10.1039/d4tc03208j), 2024-10-29
Supplement: d4tc03208j1.pdf [file d4tc03208j1.pdf]

## Supporting Information

### Highly Sensitive OFET Based Room Temperature Operated Gas Sensors Using Thieno[3,2-*b*]thiophene Extended Phthalocyanine Semiconductor

Recep Isci<sup>1,\*</sup>, Ozgur Yavuz<sup>1</sup>, Sheida Faraji<sup>1,2</sup>, Dilara Gunturkun<sup>1</sup>, Mehmet Eroglu<sup>3,4</sup>, Leszek A. Majewski<sup>2</sup>, Ismail Yılmaz<sup>1,\*</sup> and Turan Ozturk<sup>1,3,\*</sup>

<sup>1</sup>Istanbul Technical University, Chemistry Department, 34469, Maslak, Istanbul, Turkey.

<sup>2</sup>Department of Electrical and Electronic Engineering, University of Manchester, Sackville Street, Manchester M13 9PL, UK.

<sup>3</sup>TUBITAK UME, Chemistry Group Laboratories, 41470, Gebze, Kocaeli, Turkey.

<sup>4</sup>Metallurgical and Materials Engineering Dept., Faculty of Engineering, Marmara University, Aydınevler, Maltepe, 34854, Istanbul, Turkey.

E-mail: [isci@itu.edu.tr](mailto:isci@itu.edu.tr), [iyilmaz@itu.edu.tr](mailto:iyilmaz@itu.edu.tr), and [ozturktur@itu.edu.tr](mailto:ozturktur@itu.edu.tr)

### Contents

|                                  |   |
|----------------------------------|---|
| 1. Computational Study .....     | 2 |
| 2. OFET Devices .....            | 2 |
| 3. NMR and Mass Collection ..... | 3 |

## 1. Computational Study

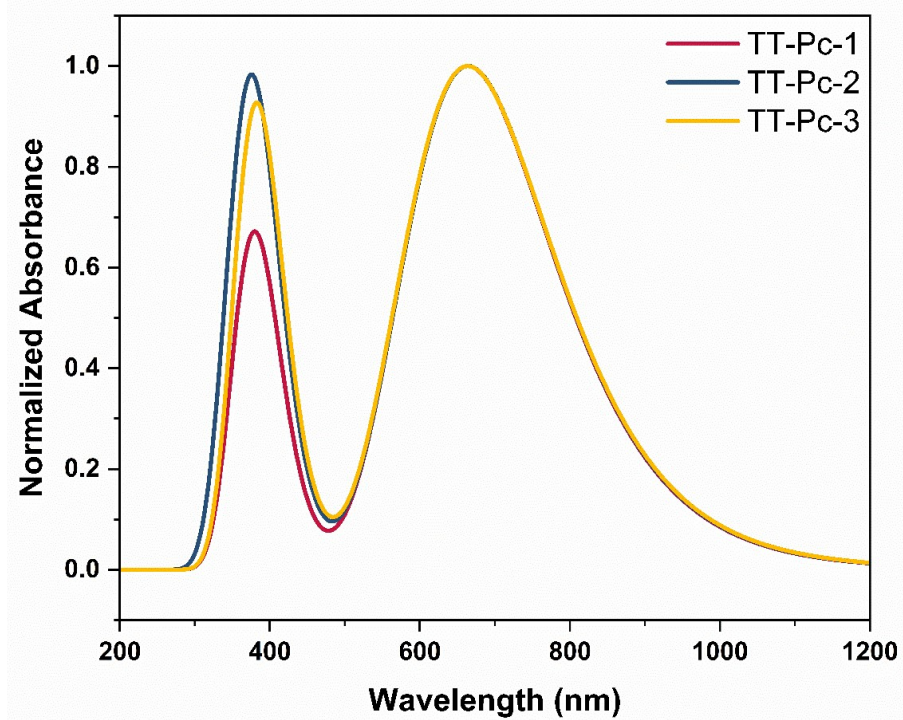

Fig. S1 Normalized absorption spectrums of TT-Pc molecules in the presence of tetrahydrofuran solvent at CAM-B3LYP/6-31G (d, p).

## 2. OFET Devices

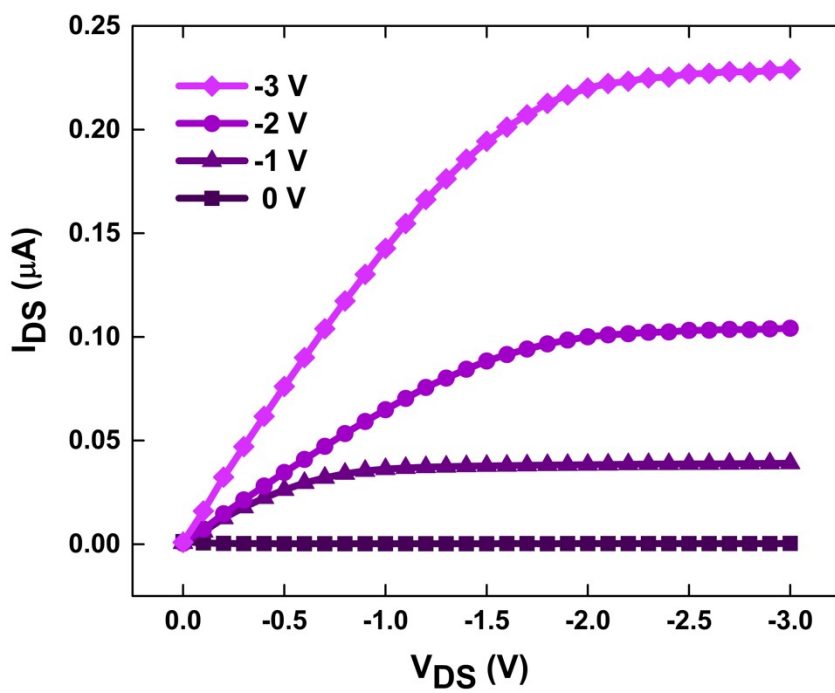

Fig. S2 The leakage current characteristics of TT-Pc OFETs.

### 3. NMR and Mass Collection

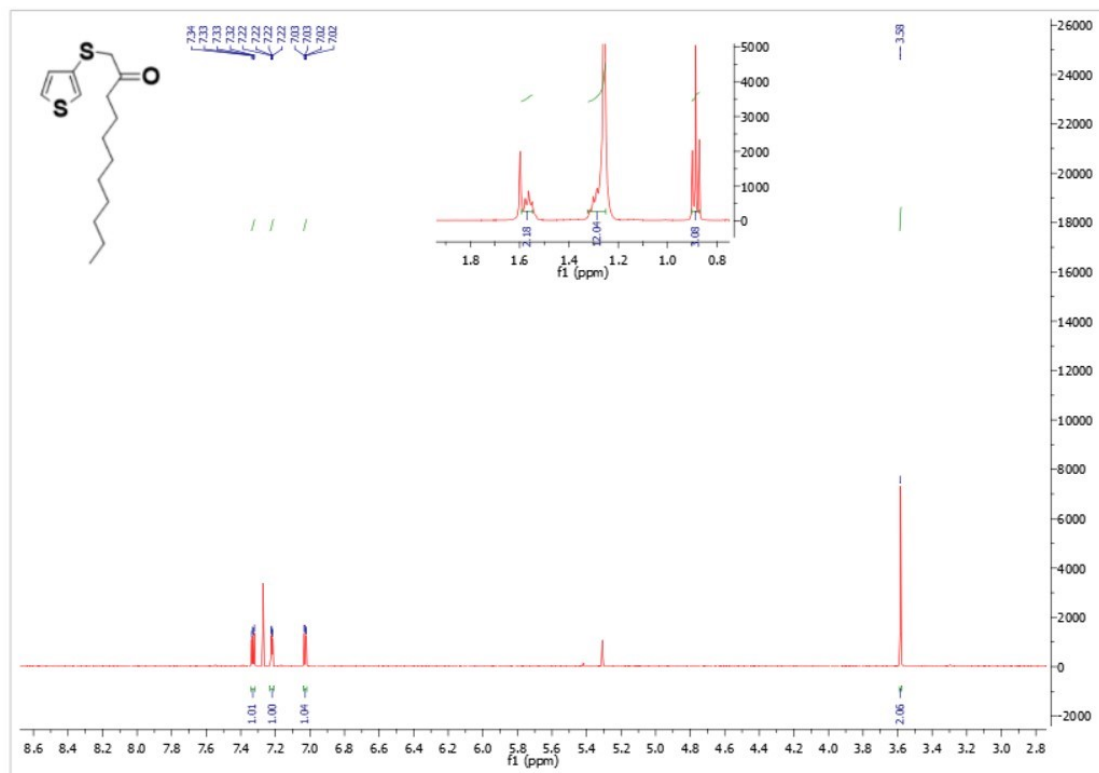

Fig. S3  $^1\text{H-NMR}$  spectra of **2** in  $\text{CDCl}_3$ .

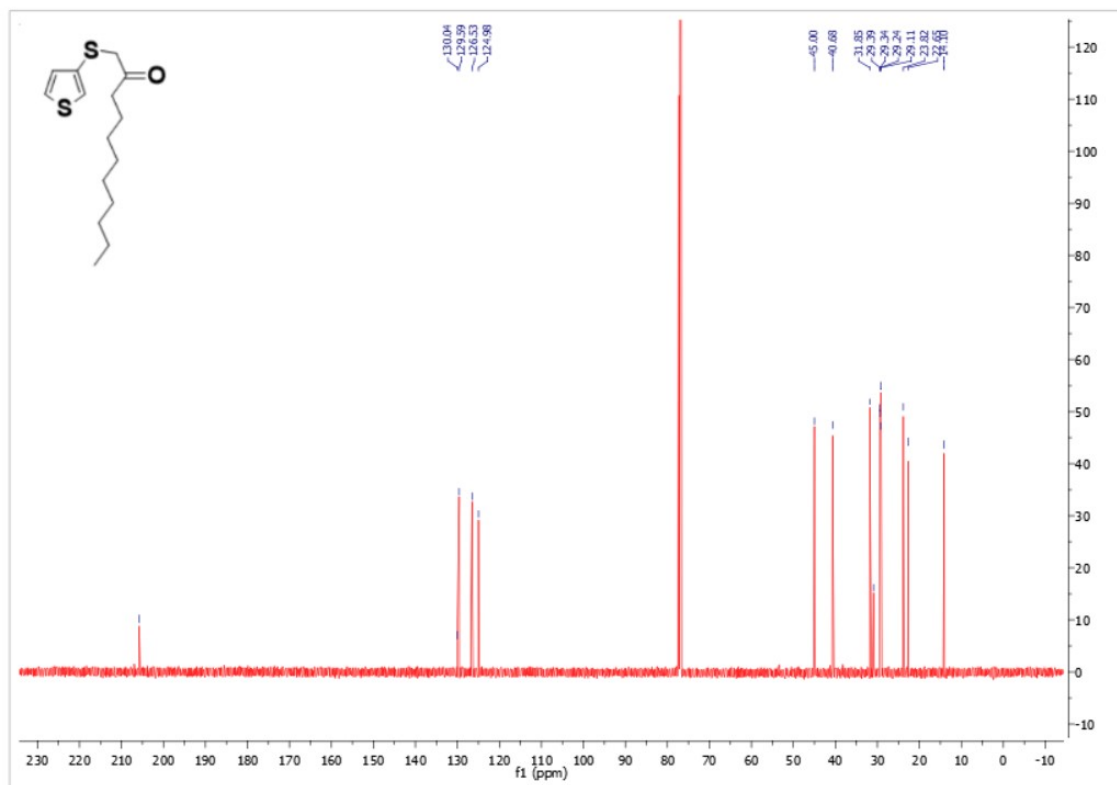

Fig. S4  $^{13}\text{C-NMR}$  spectra of **2** in  $\text{CDCl}_3$ .

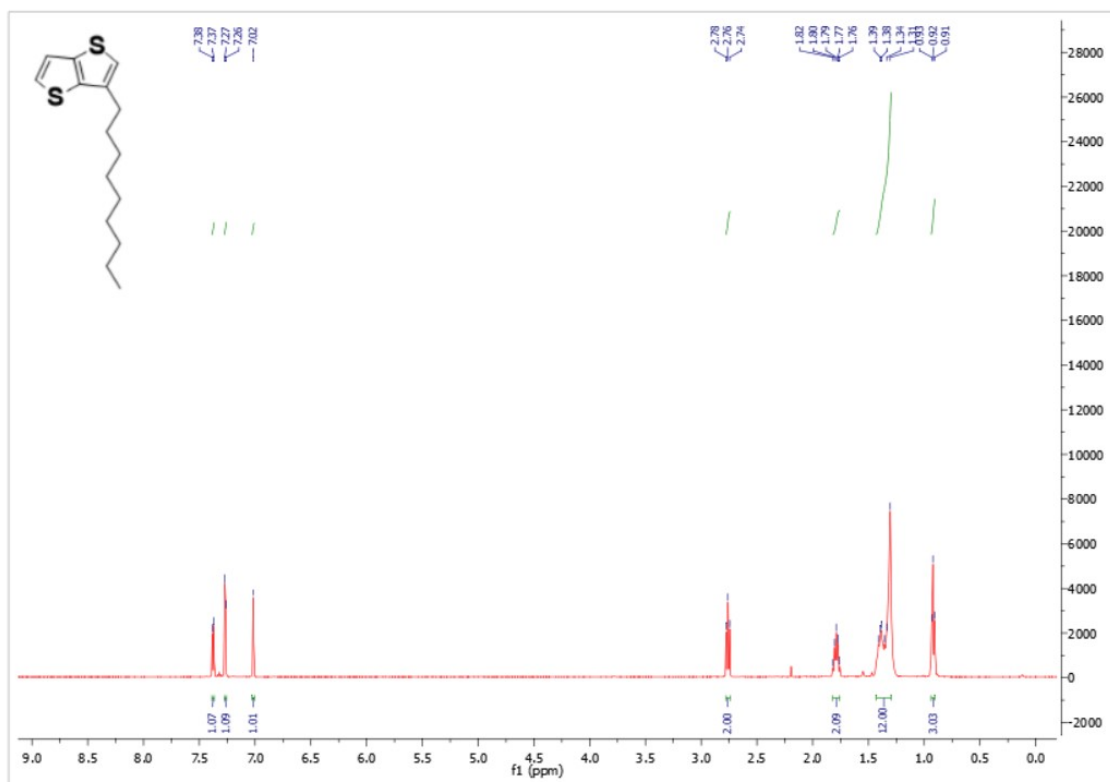

Fig. S5 <sup>1</sup>H-NMR spectra of **3** in CDCl<sub>3</sub>.

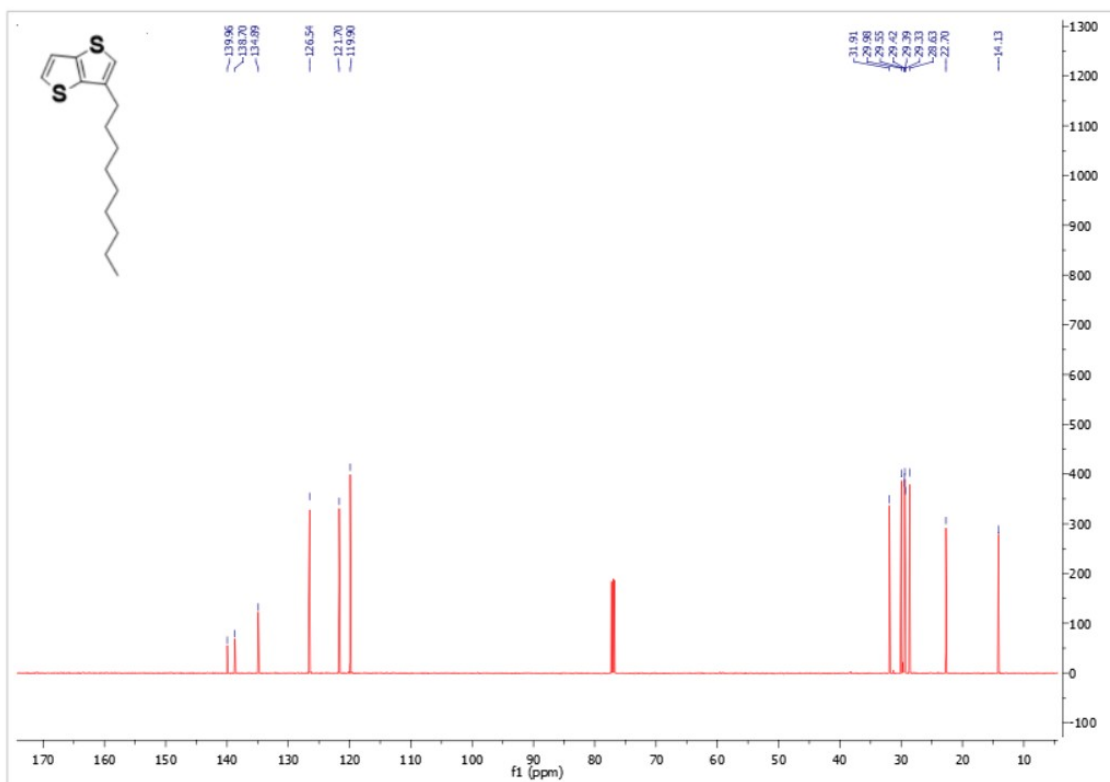

Fig. S6 <sup>13</sup>C-NMR spectra of **3** in CDCl<sub>3</sub>.

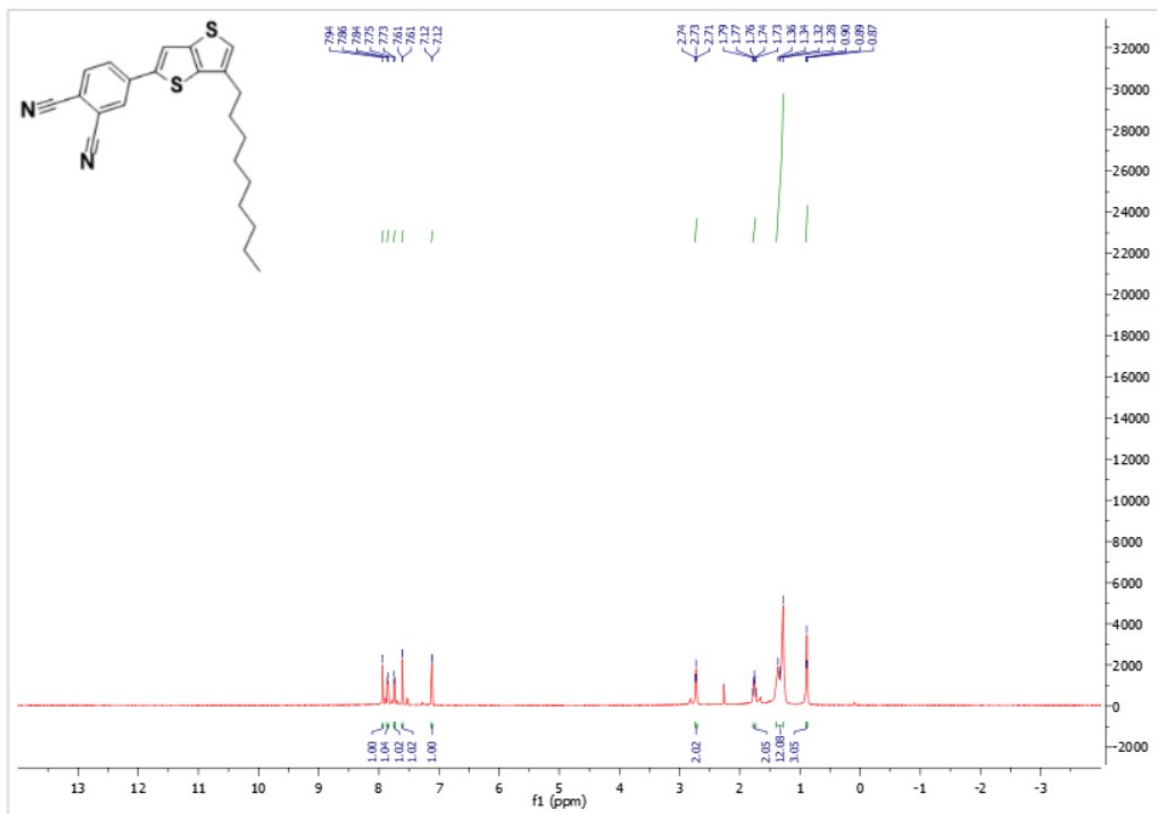

Fig. S7 <sup>1</sup>H-NMR spectra of **5** in CDCl<sub>3</sub>.

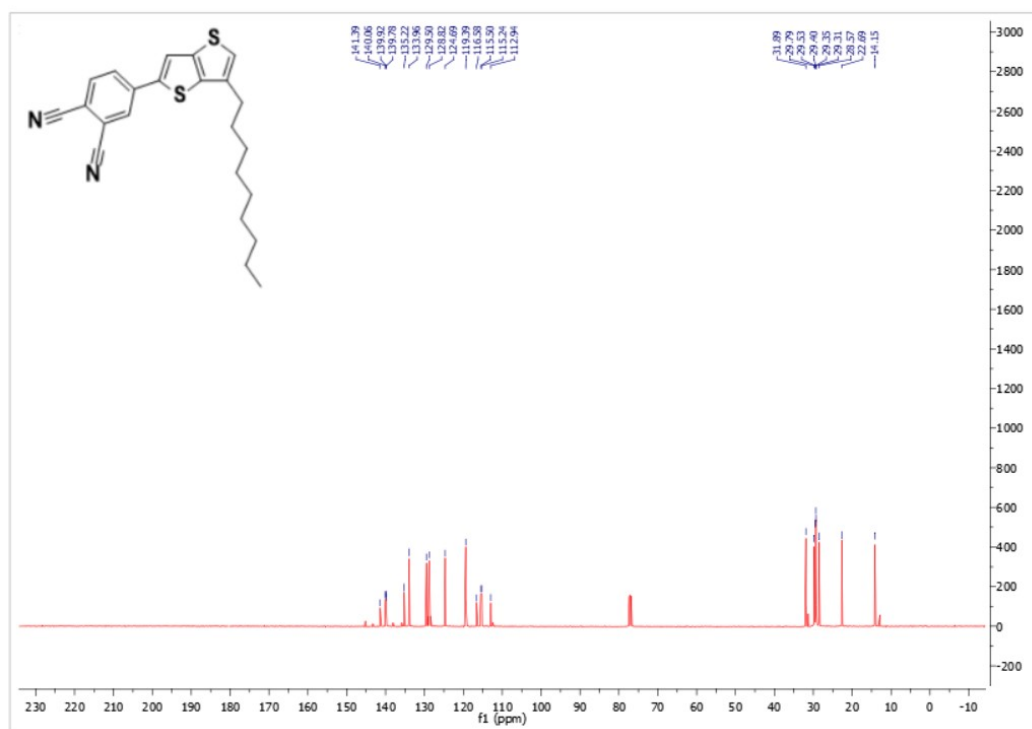

Fig. S8 <sup>13</sup>C-NMR spectra of **5** in CDCl<sub>3</sub>.

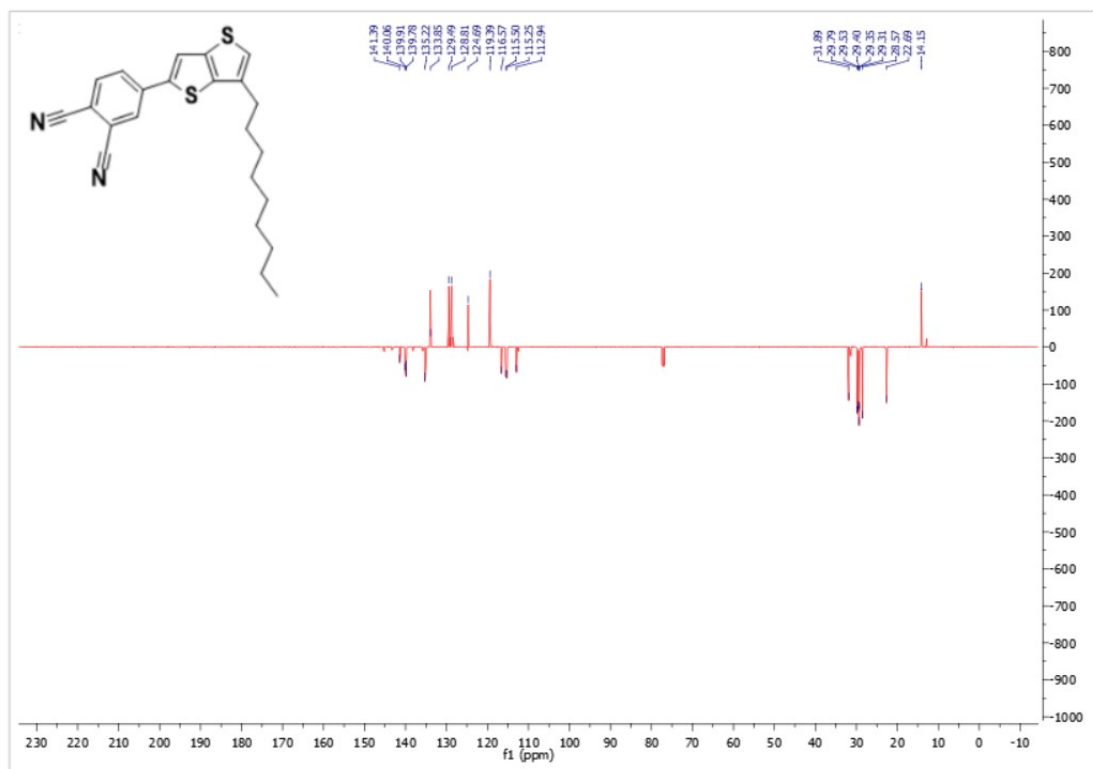

**Fig. S9** APT spectra of **5** in  $\text{CDCl}_3$ .

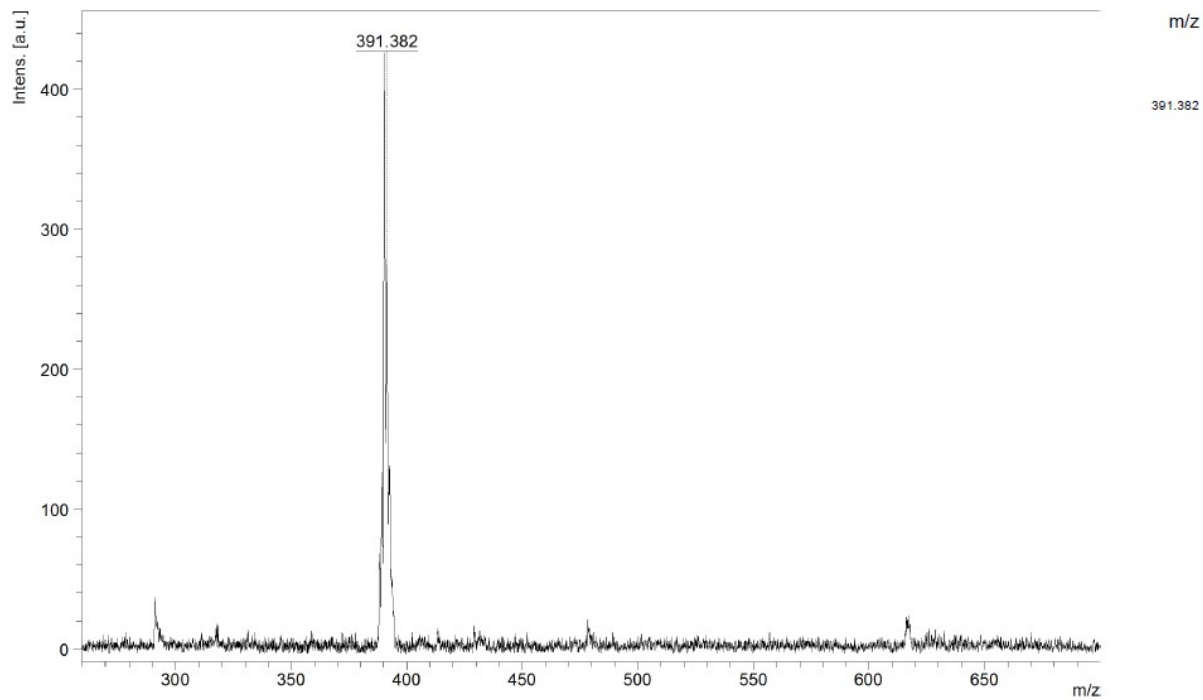

**Fig. S10** Mass spectra of **5**.

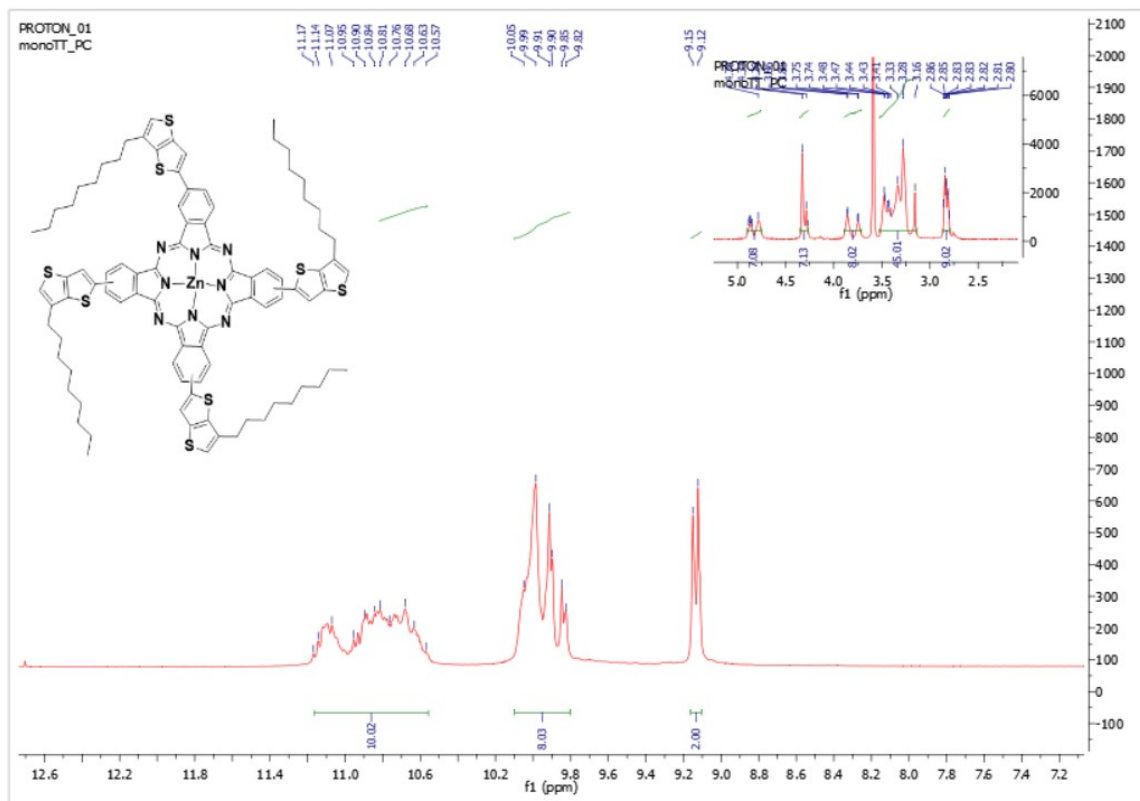

Fig. S11  $^1\text{H-NMR}$  spectra of TT-Pc in  $\text{THF-d}_8$ .

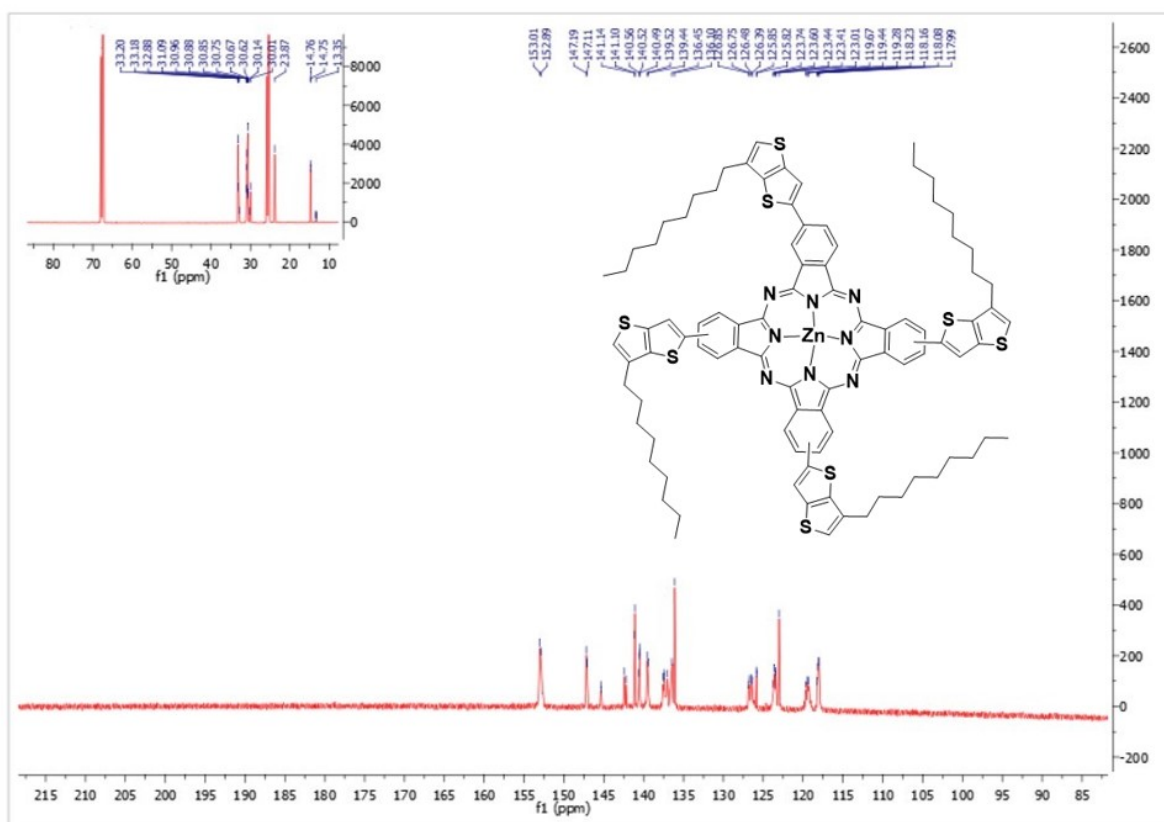

Fig. S12  $^{13}\text{C-NMR}$  spectra of TT-Pc in  $\text{THF-d}_8$ .

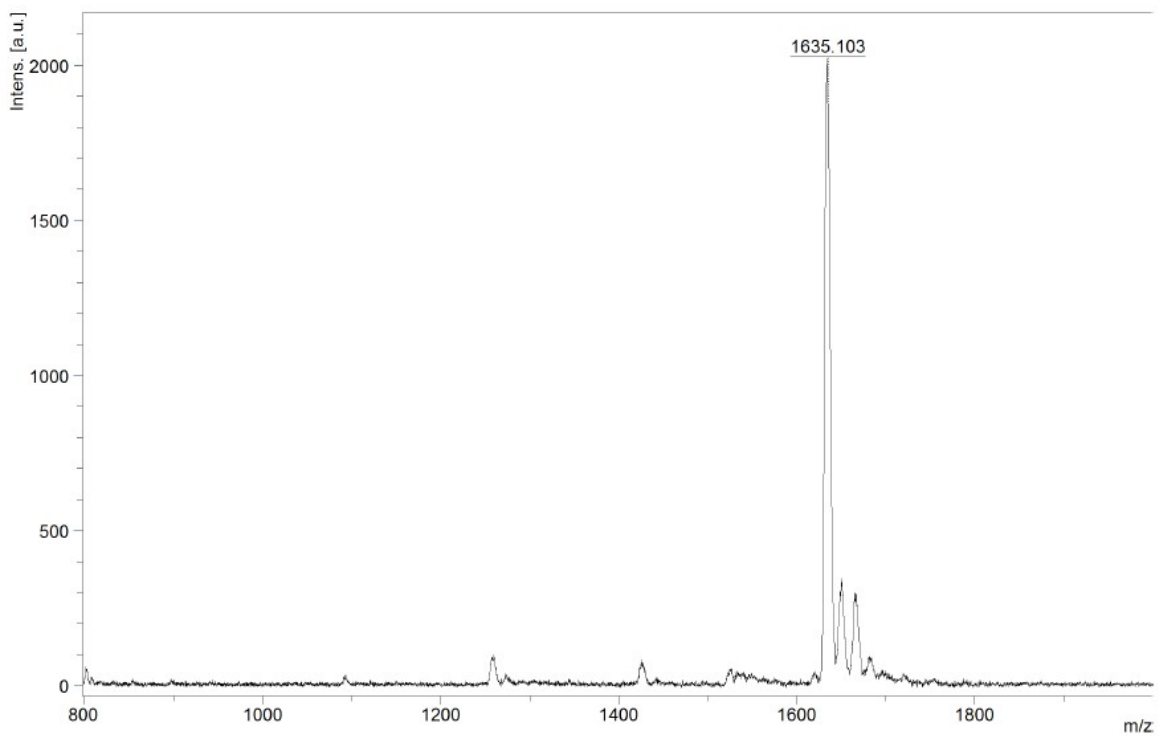

**Fig. S13** Mass spectra of **TT-Pc**.
